# Supplementary material
Source: PubMed Central journal article supplement (PMC3425199)
Supplement: supp_pp.112.199018_199018Supplemental_Data-Final.pdf [file supp_pp.112.199018_199018Supplemental_Data-Final.pdf]

## Supplemental Data

**Supplemental Table S1** Primers used for preparation of stable transformation vectors and VIGS constructs

| Primer name      | Primer sequence (5'-3')                    | Construct           |
|------------------|--------------------------------------------|---------------------|
| pRESC5-C4-1      | ATGGGTAATAACTGTTTTCCAGC                    | pRESC5-NaCDPK4      |
| pRESC5-C4-2      | TTGATGTTGGCTTCTGTGGTTATC                   |                     |
| pRESC5-C5-1      | GTTAGTGGTTCAAATAGCAATACCCC                 | pRESC5-NaCDPK5      |
| pRESC5-C5-2      | CCACAAGGAATAACCCCTCCAC                     |                     |
| CDPK4-190-VIGS-1 | GTCAGGATCCATGGGTAATAACTGTTTTTC             | pTV-NaCDPK4         |
| CDPK4-190-VIGS-2 | GTCAAAGCTTTTCTGTGGTTATCTTTAACT             |                     |
| CDPK5-190-VIGS-1 | GTCAGGATCCATGGGCAGCTGTTTTTCTAG             | pTV-NaCDPK5         |
| CDPK5-190-VIGS-2 | GTCAAAGCTTGGCTGTTTTTTGTATTAATAT            |                     |
| CDPK4/5-VIGS-1   | GCGGCGGTGCGACCAACCTAGGAGTTCTCAG<br>C       | pTV-NaCDPK4/5       |
| CDPK4/5-VIGS-1   | GCGGCGGGATCCACATTCTCGTGACCAGC              |                     |
| CDPK4-Prom-1     | CGATGAATTCGAAATTATGCACATTTTTAGTA<br>ATA    | pCAM-NaCDPK4Pro:GUS |
| CDPK4-Prom-2     | AGTCAGATCTACCATATTTAGGATATGAATAT<br>AAAACC |                     |
| CDPK5-Prom-1     | CGATGGATCCTTGTGCTTTCGCGTTGC                | pCAM-NaCDPK5Pro:GUS |
| CDPK5-Prom-2     | CTAGCCATGGATTGGTGAAAATGATGAAAAA<br>GTG     |                     |

**Supplemental Table S2** Sequences of primers used for quantitative real-time PCR (SYBR Green analysis)

| Gene             | Forward Primer (5'-3')     | Reverse Primer (5'-3')     |
|------------------|----------------------------|----------------------------|
| Na <i>Actin2</i> | GGTCGTACCACCGGTATTGTG      | GTCAAGACGGAGAATGGCATG      |
| Na <i>CDPK1</i>  | CCGTGCAGCCGATACAAAC        | TTTCCCAAGTGTATATTGCTTCCTAA |
| Na <i>CDPK2</i>  | GCAATGTGGCGAACTCGG         | CTGCTGTTTCACCTCTGGCAC      |
| Na <i>CDPK4</i>  | CGTTGCCACCCACAAGTCTAA      | TACATCCTCAACTGCAATCGTAG    |
| Na <i>CDPK5</i>  | GGGTATACATATGTTGCTACAGAT   | ACCACATTCTCGTGACCAGC       |
| Na <i>GLA1</i>   | AGTAGCAGATGATGTTAGTACATGTA | ACATGTGAATATGCCCATGGCATACT |
| Na <i>LOX3</i>   | GGCAGTGAAATTCAAAGTAAGAGC   | CCCAAAATTTGAATCCACAACA     |
| Na <i>AOS</i>    | GACGGCAAGAGTTTTCCAC        | TAACCGCCGGTGAGTTCAGT       |
| Na <i>AOC</i>    | AACTACCTAACCCTCTCATTTCTCA  | AAGCGAAGATAGGCAGGGC        |
| Na <i>OPR3</i>   | AATGGAGTTGGAGTTTGTTT       | AGGTGGTTGAAGCAGTCGTT       |
| Na <i>ACX1</i>   | GAATGTCTGTTGCTTGTGCTCA     | TACCGCAAAGCACCTCCAG        |

**Supplemental Table S3** Accession numbers or locus numbers of genes whose deduced protein sequences were used for phylogenetic analysis

| Gene           | Accession No. | Gene           | Accession No. | Gene            | Accession No. |
|----------------|---------------|----------------|---------------|-----------------|---------------|
| <i>AtCPK1</i>  | At5g04870     | <i>AtCPK18</i> | At4g36070     | <i>NtCDPK1</i>  | AF072908      |
| <i>AtCPK2</i>  | At3g10660     | <i>AtCPK19</i> | At1g61950     | <i>NtCDPK2</i>  | AJ344154      |
| <i>AtCPK3</i>  | At4g23650     | <i>AtCPK20</i> | At2g38910     | <i>NtCDPK3</i>  | AJ344155      |
| <i>AtCPK4</i>  | At4g09570     | <i>AtCPK21</i> | At4g04720     | <i>NtCDPK4</i>  | AF435451      |
| <i>AtCPK5</i>  | At4g35310     | <i>AtCPK22</i> | At4g04710     | <i>NtCDPK5</i>  | AY971376      |
| <i>AtCPK6</i>  | At2g17290     | <i>AtCPK23</i> | At4g04740     | <i>NtCDPK9</i>  | HQ141792      |
| <i>AtCPK7</i>  | At5g12480     | <i>AtCPK24</i> | At2g31500     | <i>NtCDPK11</i> | HQ158609      |
| <i>AtCPK8</i>  | At5g19450     | <i>AtCPK25</i> | At2g35890     | <i>NtCDPK12</i> | GQ337420      |
| <i>AtCPK9</i>  | At3g20410     | <i>AtCPK26</i> | At4g38230     | <i>NpCDPK17</i> | AJ699161      |
| <i>AtCPK10</i> | At1g18890     | <i>AtCPK27</i> | At4g04700     | <i>MtCDPK1</i>  | AY821654      |
| <i>AtCPK11</i> | At3g20410     | <i>AtCPK28</i> | At5g66210     | <i>StCDPK1</i>  | AF363784      |
| <i>AtCPK12</i> | At5g23580     | <i>AtCPK29</i> | At1g76040     | <i>StCPK4</i>   | AB279737      |
| <i>AtCPK13</i> | At3g51850     | <i>AtCPK30</i> | At1g74740     | <i>StCPK5</i>   | AB279738      |
| <i>AtCPK14</i> | At2g41860     | <i>AtCPK31</i> | At4g04695     |                 |               |
| <i>AtCPK15</i> | At4g21940     | <i>AtCPK32</i> | At3g57530     |                 |               |
| <i>AtCPK16</i> | At2g17890     | <i>AtCPK33</i> | At1g50700     |                 |               |
| <i>AtCPK17</i> | At5g12180     | <i>AtCPK34</i> | At5g19360     |                 |               |

Note: the first two letter of each gene indicate the species origins of these genes. At: *Arabidopsis thaliana*; Nt: *Nicotiana tabacum*; Np: *Nicotiana plumbaginifolia*; St: *Solanum tuberosum*; Mt: *Medicago truncatula*.

## Supplemental Figures

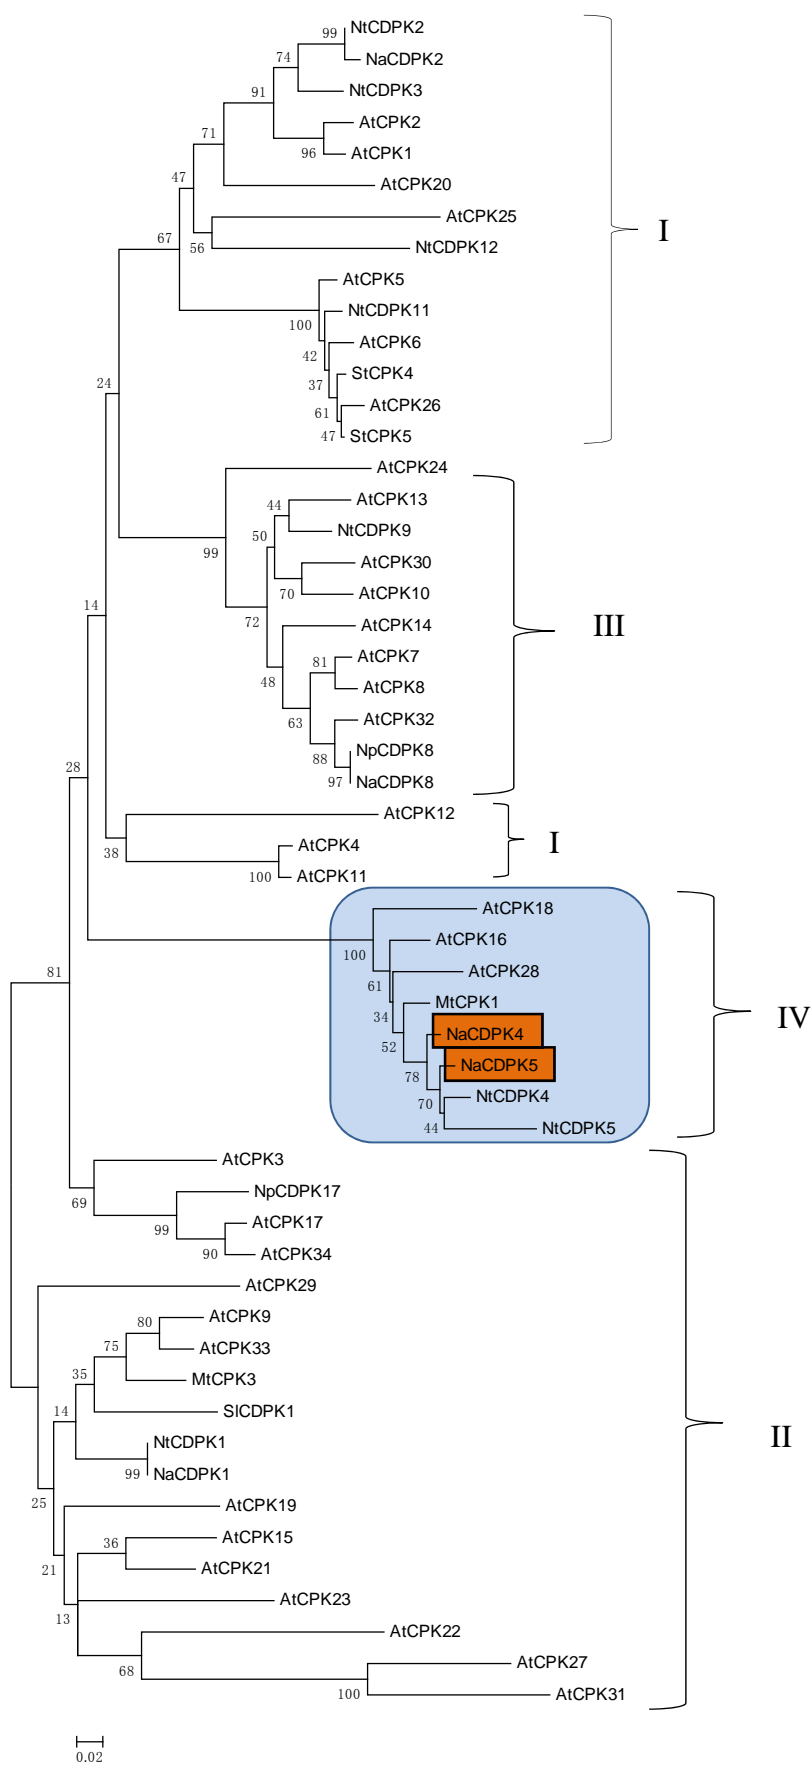

**Supplemental Figure S1.** Phylogenetic analysis of CDPKs.

Protein sequences of CDPKs from different plants were aligned using the Clustal W algorithm, and an unrooted Neighbor-Joining tree and bootstrap values were constructed using MEGA 4 software. The first two letters of protein names indicate species origins (At: *Arabidopsis thaliana*, Nt: *Nicotiana tabacum*; Np: *Nicotiana plumbaginifolia*; St: *Solanum tuberosum*; Mt: *Medicago truncatula*). Roman numbers indicate the subgroups of CDPKs according to Cheng et al., Plant Physiology, 2002, **129**, 469-485. NaCDPK4 and NaCDPK5 are highlighted in an orange background and CDPKs that cluster with Arabidopsis subgroup IV of CDPKs are indicated with a blue box.

A

|         |                                                                  |
|---------|------------------------------------------------------------------|
| NaCDPK4 | MCNNCFSSSKVSGSNSNTPSTTTTTTTNNVRRNTANPPSTSTITSTKQEGSHCNKQKVVD     |
| NaCDPK5 | MG-SCFSSSKVSGSNSNTPSTTTTTNNVNHNR- PSTTTTTTTVTSRKQEGSNYNREKGN     |
| NaCDPK4 | NHRSQHQQPRNSQQNVKKHKNGRRQKSGVI PCGKRTDFGYDKDFDKRFTI GKLLGHGQ     |
| NaCDPK5 | NTKNSHQKQQPRSSQQNVVVKPNSRRQSGGVI PCGKRTDFGYDKDFDKRYTI GKLLGHGQ   |
| NaCDPK4 | FGYTYVATHKSNNGDRVAVKRI EKNKMVPTI AVEDVKREVKI LKALSGHENVVQFNNAFED |
| NaCDPK5 | FGYTYVATDKSSGDRVAVKKI EKNKMVLPI AVEDVKREVKI LKALAGHENVVQFYNSFED  |
| NaCDPK4 | DNYVYI VMELCEGGELL DRI LAKKDSRYAEKDAAI VVRQMLKVAAQCHLHGLVHRDMKPE |
| NaCDPK5 | DNYVYI VMELCEGGELL DRI LSKKDSRYTEKDAAI VVRQMLKVAAECHLHGLVHRDMKPE |
| NaCDPK4 | NFLFKSPKEDSPLKATDFGLSDFI RPKKKFQDI VGSAYYVAPEVLKRRSGPESDVWSI GV  |
| NaCDPK5 | NFLFKSSKMDSPLKATDFGLSDFI RPKKKFQDI VGSAYYVAPEVLKRRSGPESDVWSI GV  |
| NaCDPK4 | ITYILLCGRRPFWDKTEDGI FKEVL RNKPDFCRKPWPTI SNSAKDFVKLLLVKDPRARLT  |
| NaCDPK5 | ITYILLCGRRPFWDKTEDGI FKEVL RNKPDFRRKPWPNI SNSAKDFVKLLLVKDPRARLT  |
| NaCDPK4 | AAQAL SHPWREGGDASEI PLDI SVLSNMRFVKYSRLKQFALRALASTVDEEELAGVRD    |
| NaCDPK5 | AAQAL SHPWREGGDASEI PLDI SVLSNMRFVRY SRLKQFALRALASTLDEEELSDLKD   |
| NaCDPK4 | QFSAI DVDKNGVI SLEEMRQALAKDLPWKMESRVLEI LQAI DGNTDGLVDFPEFVAATL  |
| NaCDPK5 | QFSAI DVDKNGVI SLEEMRQALAKDLPWKMESRVLEI LQAI DSNTDGLVDFPEFVAATL  |
| NaCDPK4 | HVHQL EEHNSTKWQERSQAAFEKFDVDRDGFITPEELRMHTGLKGSIDPLLEEADI DKDG   |
| NaCDPK5 | HVHQL EEHNSTKWQERSQAAFEKFDVDRDGFITPEELKMHTGLKGSIDPLLEEADI DKDG   |
| NaCDPK4 | KI SLSEFRLLRTASMSSRMVTSPTVRGSRKS.                                |
| NaCDPK5 | KI SLSEFRLLRTASMSS- - - - - PTVRDSRRNVAL.                        |

## B

|         |                                                                 |
|---------|-----------------------------------------------------------------|
| NaCDPK4 | ATGGGTAAATAACTGTTTTTCCAGCTCAAAAGTTAGTGGTTCTAACAGCAACACCCCTCC    |
| NaCDPK5 | ATGGGC--AGCTGTTTTTCTAGCTCTAAAGTTAGTGGCTCAAATAGCAATACCCCTTCT     |
| NaCDPK4 | ACCACCAACCACCAACCACCAAGTGAATGTCCGGAGGAACAAGCCCAATCCACCTTCTACA   |
| NaCDPK5 | ACAACCTACTACAAATGTAAATGTTTCATCACAAACCGTCCTTCAACAA--CAACAA-CAACA |
| NaCDPK4 | TCCACAATTACATCAACAAAACAAGAGGGGTCTCATTGCAATAAACAGAAAGTTAAAGAT    |
| NaCDPK5 | ACAACCTGTTACATCAAGAAAACAAGAGGGGTCAAATTATAATAGAGAAAAGGTAAATATT   |
| NaCDPK4 | AAACACAGAAAGCCCAACATCAAAAACAACAACCTAGGAATTCTCAGCAAAATGTTAAGAAG  |
| NaCDPK5 | AATACAAAACACAGCCACCAAAAACAACAACCTAGGAGTTCTCAGCAAAATGTTGTTGTT    |
| NaCDPK4 | CACAAGAATGGGAGGAGACAGAAAGAGTGGGGTTATTCTTGTGGAAAGAGAACAGATTTT    |
| NaCDPK5 | AAGCCAATTCAGAAGACAAAGTGGAGGGGTTATTCTTGTGGAAAGAGAACAGATTTT       |
| NaCDPK4 | GGGTATGATAAAGATTTTGATAAGAGGTTTACCATTTGGCAAGTTGTTGGGTGATGGCCAA   |
| NaCDPK5 | GGGTATGATAAAGATTTTGATAAGAGGTTACTATTGGTAAATTGTTGGGTGATGGCCAA     |
| NaCDPK4 | TTTGGTTACACCTACGTTGCCACCCACAAGTCTAATGGAGATCGCGTGGCTGTCAAGAGA    |
| NaCDPK5 | TTTGGGTATACATATGTTGCTACAGATAAATCTTCTGGAGATCGTGTGCTGTTAAGAAA     |
| NaCDPK4 | ATTGAGAAAGACAAGATGGTTCTACGATTGCAGTTGAGGATGTAAACGAGAAAGTCAAG     |
| NaCDPK5 | ATTGAGAAAACAAGATGGTTCTTCCAATTGCGGTTGAGGATGTAAACGAGAAAGTCAAG     |
| NaCDPK4 | ATATTGAAGGCCTTATCCGGTCATGAGAAATGTGGTTCAATTCAATAATGCATTTGAGGAT   |
| NaCDPK5 | ATATTGAAGGCCTTAGCTGGTCACGAGAAATGTGGTTCAATTCTATAATTTCATTTGAGGAT  |
| NaCDPK4 | GATAACTATGTCTACATAGTAATGGAGTTATGTGAGGGTGGAGAACTCTTGGACCGTATT    |
| NaCDPK5 | GATAATTATGTCTACATCGTAATGGAGTTATGTGAGGGTGGAGAACTATTGGACCGAATC    |
| NaCDPK4 | TTGGCCAAAAAGGACAGCCGTTATGCCGAGAAAGATGCAGCAATAGTTGTACGCCAGATG    |
| NaCDPK5 | TTGTCCAAAAAGATAGTCGATATACTGAGAAAGATGCGGCGATAGTTGTACGCCAGATG     |
| NaCDPK4 | CTAAAAGTTGCCGCTCAATGTCAATTTACATGGTTTGGTGCATCGTGATATGAAACCTGAG   |
| NaCDPK5 | TTAAAAGTTGGCTGCTGAGTGTCAATTTACATGGTCTGGTGCATCGAGATATGAAACCTGAG  |
| NaCDPK4 | AATTTTCTCTTTAAATCTCCAAAGGAGGATTCAACATTGAAGGCCACAGATTTTGGTCTT    |
| NaCDPK5 | AATTTTCTCTTTAAATCTCCAAAGATGGATTGCGCATTAAAAGGCCACAGATTTTGGTCTT   |
| NaCDPK4 | TCAGACTTCATAAGACCAGGGAAAGAGTTCCAAGATTATTGTTGGCAGTGCATATTACGTA   |
| NaCDPK5 | TCAGACTTCATAAGACCAGGGAAAATTTCCAAGACATTGTTGGCAGTGCATATTATGTA     |
| NaCDPK4 | GCGCCAGAGGTATTAAAGCGTAGATCAGGACCTGAATCAGATGTGTGGAGCATTGGTGTT    |
| NaCDPK5 | GCCCCGGAGGTGTTAAAGCGTAGATCAGGACCTGAATCAGATGTATGGAGTATAGGTGTA    |
| NaCDPK4 | ATTACATACATTTTGCTCTGTGGCCGTCGGCCCTTCTGGGATAAAACAGAGGATGGCATA    |
| NaCDPK5 | ATTACATACATTTTGCTATGTGGTCGTGCGCCCTTCTGGGACAAAACAGAGGATGGTATA    |
| NaCDPK4 | TTCAAGGAGGTACTAAGAAACAAGCCTGATTTTGTGCGCAAGCCGTGGCCAACTATAAGC    |
| NaCDPK5 | TTCAAGGAGGTCTTACGAAACAAGCCTGATTTTCTGCGCAAGCCATGGCCAAACATAAGC    |
| NaCDPK4 | AACAGTGCTAAAGATTTTGTAAAGAAATTACTGGTGAAGGATCCTCGCGCTAGACTTACT    |
| NaCDPK5 | AACAGTGCTAAAGATTTTGTAAAGAAATTACTGGTGAAGGATCCGCGCGCTAGACTTACT    |
| NaCDPK4 | GCTGCCCAGGCCCTATCGCATCCATGGTCCGCGAAGGAGGTGATGCATCTGAGATTCCA     |
| NaCDPK5 | GCTGCTCAGGCCCTATCGCATCCATGGTCCGAGAAGGAGGTGATGCATCTGAGATTCCA     |
| NaCDPK4 | CTGGACATTTCCGTCTTATCAACATGCGACAATTTGTCAAGTATAGTCGATTAAAACAG     |
| NaCDPK5 | CTCGACATTTCTGTTTATCCAACATGCGGCAATTTGTCAAGTATAGTCGCTAAAACAG      |
| NaCDPK4 | TTTGCTTTACGGGCATTGGCTAGTACAGTTGATGAGGAGGAGCTGGCAGGTGTCCGGGAT    |
| NaCDPK5 | TTTGCTTTACGGGCGTTAGCTAGCACACTTGATGAGGAGGAGCTCTCTGATCTGAAGGAT    |

|         |                                                               |
|---------|---------------------------------------------------------------|
| NaCDPK4 | CAGTTTCTGCAATTGACGTGGATAAAATGGTGTATTAGCCTTGAAGAAATGAGACAG     |
| NaCDPK5 | CAATTTCTGCAATTGATGTGGATAAGAATGGTGTATCAGTCTTGAAGAAATGAGACAG    |
| NaCDPK4 | GCCCTTGCTAAGGATCTCCCTGGAAAGATGAAAGAGTCACGGGTTCTTGAGATTCTTCAA  |
| NaCDPK5 | GCCCTTGCCAAGGATCTCCCATGGAAATGAAAGAGTCACGAGTTCTTGAGATTCTTCAA   |
| NaCDPK4 | GCGATTGATGGCAACACAGATGGGCTAGTTGATTTCCAGAGTTTGTGCGAGCCCACTCTA  |
| NaCDPK5 | GCGATTGATAGTAACACTGATGGGCTTGTGATTTCCCGAGTTTGTGGCCGCCACTCTA    |
| NaCDPK4 | CATGTCCATCAGTTGGAGGAGCATAATTCTACAAAATGGCAGGAAAGATCGCAAGCTGCT  |
| NaCDPK5 | CATGTCCATCAGTTGGAGGAGCATAATTCTACAAAATGGCAGCAAAGATCACAGGCTGCT  |
| NaCDPK4 | TTTGAGAAATTTGATGTTGATAGAGATGGATTCACTAAGTCTGAAGAACTTAGAATGCAT  |
| NaCDPK5 | TTTGAGAAATTTGATGTTGATAGAGATGGATTCACTAAGTCTGAAGAACTTAAATGCAC   |
| NaCDPK4 | ACCGGCCTAAAGGGCTCCATAGACCACTTCTAGAGGAAGCAGATATCGACAAAGATGGG   |
| NaCDPK5 | ACGGGTTTGAAAGGGCTCGATAGATCCACTTTTAGAGGAAGCGGACATTGACAAAGACGGG |
| NaCDPK4 | AAGATAAGCTTGTGAGAATTTCGTAGGCTTCTAAGAACTGCAAGTATGAGTTCAAGGATG  |
| NaCDPK5 | AAGATAAGCCTGTGAGAATTCGTAGGCTTTAAGAACTGCTAGTATGAGTTCAACCACT    |
| NaCDPK4 | GTGACTAGTCCAAGTGTAGAGGCTCTCGGAAAAGTTAG                        |
| NaCDPK5 | GTGAGAGATTACCGGAGAAATGTAGCTTTGTAA                             |

**Supplemental Figure S2.** Alignment of NaCDPK4 and NaCDPK5 amino acid and nucleotide sequences and regions used for RNAi constructs.

**(A)** Amino acid sequence alignment of NaCDPK4 and NaCDPK5. Regions used for constructing pRESC5-CDPK4 and pRESC5-CDPK5 are indicated with the red and blue bar, respectively. The sequences under the brown, green, and purple bars represent the kinase domain, autoinhibitory domain, and EF hands, respectively. **(B)** Nucleotide sequence alignment of *NaCDPK4* and *NaCDPK5*. Regions used for constructing pRESC5-CDPK4 and pRESC5-CDPK5 are below the red and blue bar, respectively.

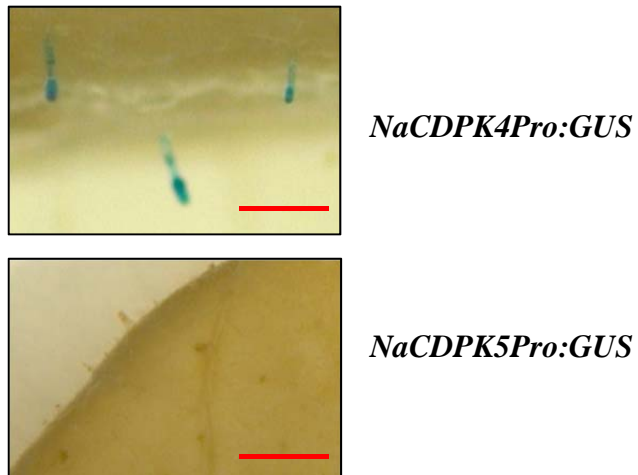

**Supplemental Figure S3.** *NaCDPK4* but not *NaCDPK5* is expressed in trichomes of *N. attenuata*.

Histochemical GUS assays were done for the leaves of *NaCDPK4Pro:GUS* and *NaCDPK5Pro:GUS* plants. Photographs were taken under a stereo microscope. Bar = 200  $\mu\text{m}$ .

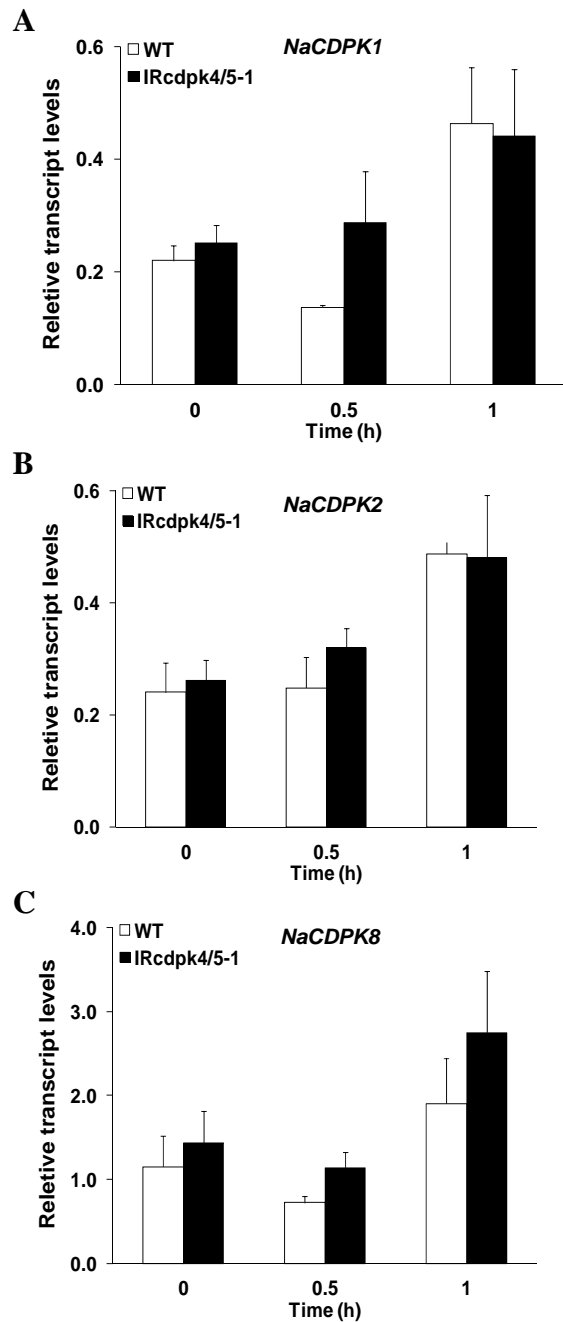

**Supplemental Figure S4.** Transcript levels of other CDPKs in IRcdpk4/5 plants.

Wild-type (WT) and IRcdpk4/5 (line IRcdpk4/5-1) plants were wounded with a pattern wheel and 20  $\mu$ L of *M. sexta* OS were applied to wounds. Transcript levels (mean  $\pm$  SE) of (A) *NaCDPK1*, (B) *NaCDPK2*, and (C) *NaCDPK8* were determined using qRT-PCR in samples collected at indicated times (N = 5).

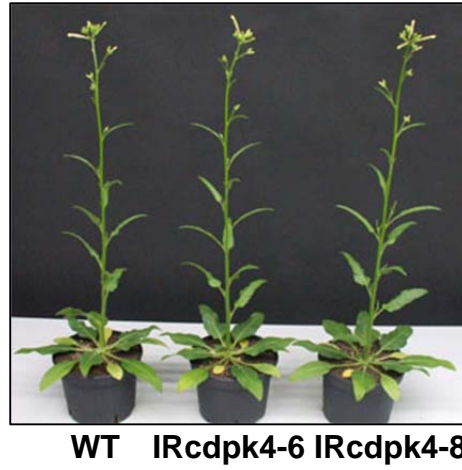

**Supplemental Figure S5.** Morphology of IRcdpk4 plants at early flowering stage.

Wild-type (WT) and IRcdpk4 (lines IRcdpk4-6 and IRcdpk4-8) plants were photographed 43 days after germination.

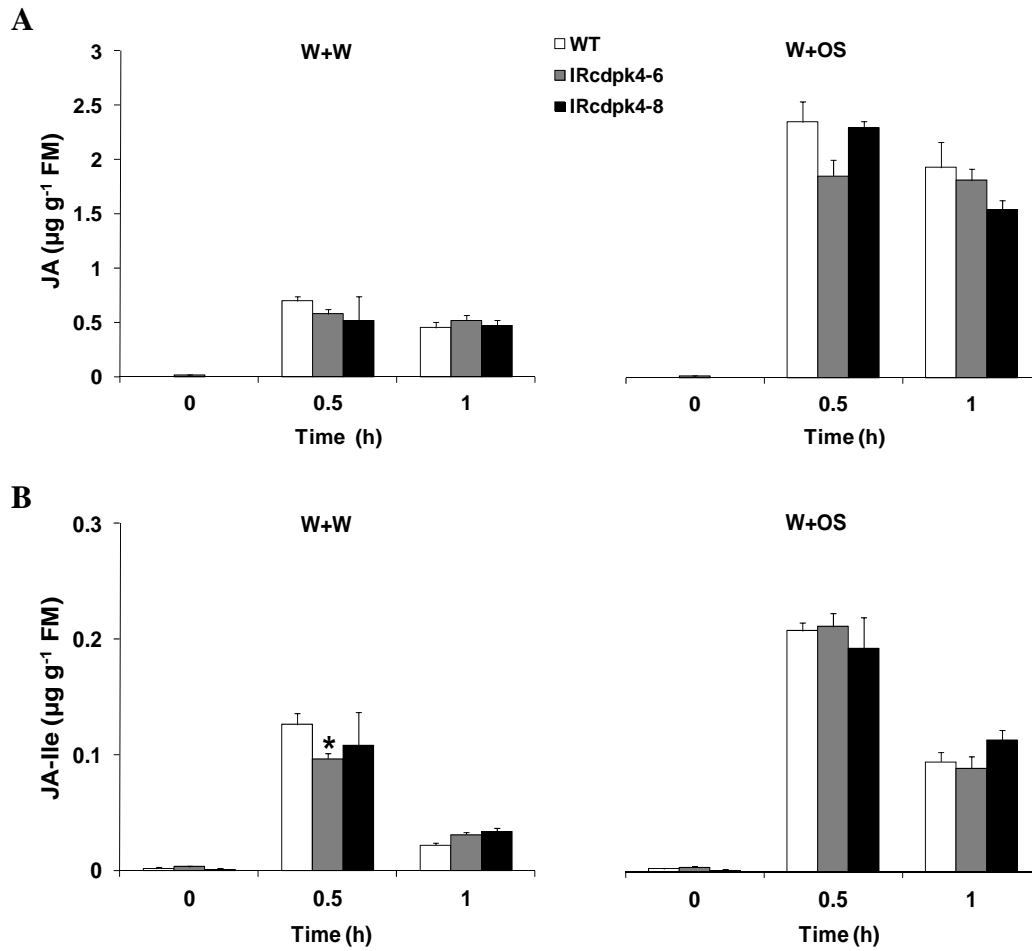

**Supplemental Figure S6.** JA and JA-Ile contents in IRcdpk4 plants.

Wild-type (WT) and IRcdpk4 (lines IRcdpk4-6 and IRcdpk4-8) were wounded with a pattern wheel and 20  $\mu$ L of water or *M. sexta* OS were applied to wounds (W+W and W+OS, respectively). Contents (mean  $\pm$  SE) of **(A)** JA and **(B)** JA-Ile were analyzed in samples collected after indicated times. Asterisks indicate significant differences between WT and IRcdpk4 plants (Student's *t*-test; \*,  $P < 0.05$ ; \*\*,  $P < 0.01$ ; \*\*\*,  $P < 0.001$ ).

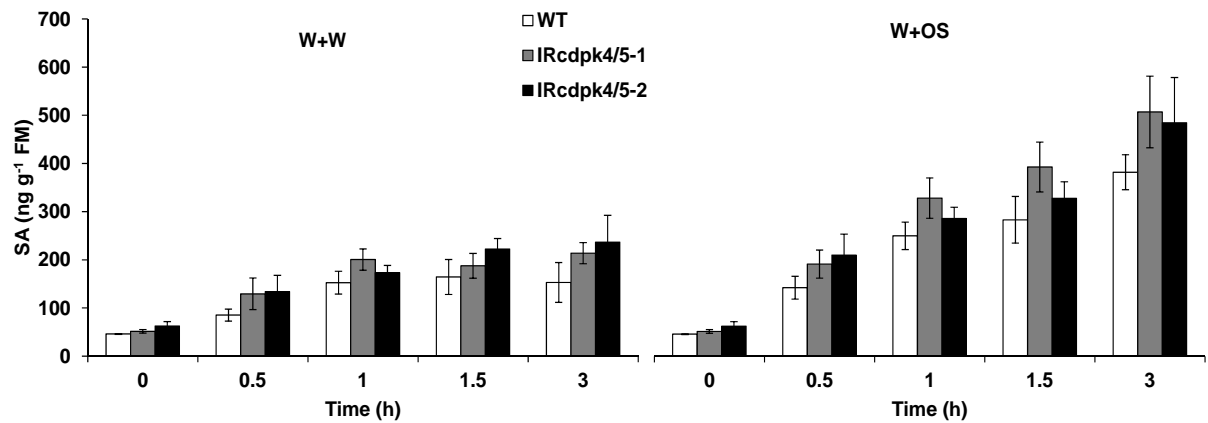

**Supplemental Figure S7.** SA contents in wild-type and IRcdpk4/5 plants.

Wild-type (WT) and IRcdpk4/5 (lines IRcdpk4/5-1 and IRcdpk4/5-2) were wounded with a pattern wheel and 20  $\mu$ L of water or *M. sexta* OS were applied to wounds (W+W and W+OS, respectively). Contents (mean  $\pm$  SE) of SA were analyzed in samples collected after indicated times. No significant differences between WT and IRcdpk4 plants (Student's *t*-test).

|         |                                                                 |
|---------|-----------------------------------------------------------------|
| NaCDPK4 | ATGGGTAATAAAGTGTCTTTCTCAGCTCAAAAAGTTAGTGGTTCTAACAGCAACACCCCTCTC |
| NaCDPK5 | ATGGGC--AGCTGTCTTTCTAGCTCTAAAGTTAGTGGCTCAAATAGCAATACCCCTCTCT    |
| NaCDPK4 | ACCAACACCAACCAACCAACCGTGAATGTCCGGAGGAACACAGCCAATCCACCTTCTACA    |
| NaCDPK5 | ACAACTACTACAAATGTAATGTTTCATCAACAACCGTCCTTCAACAA--CAACAA-CAACA   |
| NaCDPK4 | TCCACAATTACATCAACAAAAACAAGAGGGTCTCATTGCAATAAACAGAAAGTTAAAGAT    |
| NaCDPK5 | ACAACTGTTACATCAAGAAAAACAAGAGGGTCAAATTATAATAGAGAAAAAGGTAATATT    |
| NaCDPK4 | AACCACAGGAAGCCAACATCAAAAAACAACCTAGGAATTTCTCAGCAAAATGTTAAGAAG    |
| NaCDPK5 | AATACAAAAAACAGCCACCAAAAAACAACCTAGGAGTTCTCAGCAAAATGTTGTTGTT      |
| NaCDPK4 | CACAAGAATGGGAGGAGACAGAAAGAGTGGGGTTATTCTTGTGGGAAGAGAACAGATTTT    |
| NaCDPK5 | AAGCCAATTCAGAAGACAAAGTGGAGGGGTTATTCTTGTGGGAAAAGAACAGATTTT       |
| NaCDPK4 | GGGTATGATAAAGATTTTGATAAGAGGTTTACCATTGGCAAGTTGTTGGGTCTGGCCAA     |
| NaCDPK5 | GGGTATGATAAAGATTTTGATAAGAGGTTATACTATTGGTAAATTGTTGGGTCTGGCCAA    |
| NaCDPK4 | TTTGGTTACACCTACGTTGCCACCCACAAGTCTAATGGAGATCGCGTCTGCTGTCAAGAGA   |
| NaCDPK5 | TTTGGGTATACATATGTTGCTACAGATAAATCTTCTGGAGATCGTGTGCTGTTAAGAAA     |
| NaCDPK4 | ATTGAGAAAGACAAGATGGTTCCTACGATTGCAGTTGAGGATGTAAACGAGAAAGTCAAG    |
| NaCDPK5 | ATTGAGAAAACAAGATGGTCTTCCAATTGCGGTTGAGGATGTCAAACGAGAAAGTCAAG     |
| NaCDPK4 | ATATTGAAGGCCTTATCCGGTCATGAGAATGTGGTCAATTCAATAATGCATTTGAGGAT     |
| NaCDPK5 | ATATTGAAGGCCTTAGCTGGTCACGAGAATGTGGTCAATTCTATAATTCAATTTGAGGAT    |
| NaCDPK4 | GATAACTATGTCTACATAGTAATGGAGTTATGTGAGGGTGGAGAACTCTTGGACCGTATT    |
| NaCDPK5 | GATAATTATGTCTACATCGTAATGGAGTTATGTGAGGGTGGAGAACTATTGGACCGAATC    |
| NaCDPK4 | TTGGCCAAAAAGGACAGCCGTTATGCCGAGAAAGATGCAGCAATAGTTGTACGCCAGATG    |
| NaCDPK5 | TTGTCCAAAAAGATAGTCGATATACTGAGAAAGATGCGGCGATAGTTGTACGCCAGATG     |
| NaCDPK4 | CTAAAAAGTTGCCGCTCAATGTCAATTTACATGGTTTGGTGCATCGTGATATGAAACCTGAG  |
| NaCDPK5 | TTAAAAAGTGGCTGCTGAGTGTCAATTTACATGGTCTGGTGCATCGAGATATGAAACCTGAG  |
| NaCDPK4 | AATTTTCTCTTTAAATCTCAAAGGAGGATTCAACATTGAAGGCCACAGATTTTGGTCTT     |
| NaCDPK5 | AATTTTCTCTTTAAATCTCAAAGATGGATTGCGCATTAAAAGGCCACAGATTTTGGTCTT    |
| NaCDPK4 | TCAGACTTCATAAGACCAGGGAAGAAAGTTCCAAGATTATTGTTGGCAGTGCATATTACGTA  |
| NaCDPK5 | TCAGACTTCATAAGACCAGGGAATAAATTCCAAGACATTGTTGGCAGTGCATATTATGTA    |
| NaCDPK4 | GCGCCAGAGGTATTAAAGCGTAGATCAGGACCTGAATCAGATGTGTGGAGCATTGGTGTT    |
| NaCDPK5 | GCCCGGAGGTGTTAAAGCGTAGATCAGGACCTGAATCAGATGTATGGAGTATAGGTGTA     |
| NaCDPK4 | ATTACATACATTTTGCTCTGTGGCCGTCGGCCCTTCTGGGATAAAAACAGAGGATGGCATA   |
| NaCDPK5 | ATTACATACATTTTGCTATGTGCTCGTCGGCCCTTCTGGGACAAAACAGAGGATGGTATA    |
| NaCDPK4 | TTCAAGGAGGTACTAAGAAACAAGCCTGATTTTGTGCGCAAGCGTGGCCAACTATAAGC     |
| NaCDPK5 | TTCAAGGAGGTCTTACGAAACAAGCCTGATTTTCTGCGCAAGCCATGGCCAAACATAAGC    |
| NaCDPK4 | AACAGTGCTAAAGATTTTGTTAAGAAATTACTGGTGAAGGATCCTCGCGCTAGACTTACT    |
| NaCDPK5 | AACAGTGCTAAAGATTTTGTTAAGAAATTACTGGTGAAGGATCCCGCGCTAGACTTACT     |
| NaCDPK4 | GCTGCCAGGCCCTATCGCATCCATGGTCCGGAAGGAGGTGATGCATCTGAGATTCCA       |
| NaCDPK5 | GCTGCTCAGGCCCTATCGCATCCATGGTCCGGAAGGAGGTGATGCATCTGAGATTCCA      |
| NaCDPK4 | CTGGACATTTCCGTCTTATCAACATGCGACAATTTGTCAAGTATAGTCGATTAAAACAG     |
| NaCDPK5 | CTCGACATTTCTGTCTTATCAACATGCGGCAATTTGTCAAGTATAGTCGCTAAAACAG      |
| NaCDPK4 | TTTGCTTTACGGGCATTGGCTAGTACAGTTGATGAGGAGGAGCTGGCAGGTGTCCGGGAT    |
| NaCDPK5 | TTTGCTTTACGGGCGTTAGCTAGCACACTTGATGAGGAGGAGCTCTCTGATCTGAAGGAT    |

|         |                                                               |
|---------|---------------------------------------------------------------|
| NaCDPK4 | CAGTTTCTGCAATTGACGTGGATAAAATGGTGTCACTAGCCTTGAAGAAATGAGACAG    |
| NaCDPK5 | CAATTTCTGCAATTGATGTGGATAAGAATGGTGTCACTAGTCTTGAAGAAATGAGACAG   |
| NaCDPK4 | GCCCTTGCTAAGGATCTTCCCTGGAAAGATGAAAGAGTCACGGGTTCTTGAGATTCTTCAA |
| NaCDPK5 | GCCCTTGCCAAGGATCTCCCATGGAAATGAAAGAGTCACGAGTTCTTGAGATTCTTCAA   |
| NaCDPK4 | GCGATTGATGGCAACACAAGATGGGCTAGTTGATTTCCAGAGTTTGTGCGAGCCACTCTA  |
| NaCDPK5 | GCGATTGATAGTAACACTGATGGGCTTGTGATTTCCCGGAGTTTGTGGCCGCCACTCTA   |
| NaCDPK4 | CATGTCCATCAGTTGGAGGAGCATAAATTCTACAAAATGGCAGGAAAGATCGCAAGCTGCT |
| NaCDPK5 | CATGTCCATCAGTTGGAGGAGCATAAATTCTACAAAATGGCAGCAAAGATCACAGGCTGCT |
| NaCDPK4 | TTTGAGAAATTTGATGTTGATAGAGATGGATTCATAACTCCTGAAGAACTTAGAATGCAT  |
| NaCDPK5 | TTTGAGAAATTTGATGTTGATAGAGATGGATTCATAACTCCTGAAGAACTTAAATGCAC   |
| NaCDPK4 | ACCGGCCTAAAGGGCTCCATAGACCCACTTCTAGAAGAAGCAGATATCGACAAAGATGGG  |
| NaCDPK5 | ACGGGTTTGAAAGGGCTCGATAGATCCACTTTTAGAGGAAGCGGACATTGACAAAGACGGG |
| NaCDPK4 | AAGATAAGCTTGTGAGAATTTCGTAGGCTTCTAAGAACTGCAAGTATGAGTTCAAGGATG  |
| NaCDPK5 | AAGATAAGCCTGTGAGAATTCGTAGGCTTTAAGAACTGCTAGTATGAGTTCAACCAACT   |
| NaCDPK4 | GTGACTAGTCCAAGTGTAGAGGCTCTCGGAAAAGTTAG                        |
| NaCDPK5 | GTGAGAGATTCACGGAGAAATGTAGCTTTGTAA                             |

**Supplemental Figure S8.** Sequences used for preparing VIGS constructs.

The first 190 bp of *NaCDPK4* and *NaCDPK5* coding sequences were used to construct pTV-*NaCDPK4* and pTV-*NaCDPK5* (indicated by the yellow and green bar, respectively). The sequence of *NaCDPK5* under the purple bars was used to prepare pTV-*NaCDPK4/5*.

**A**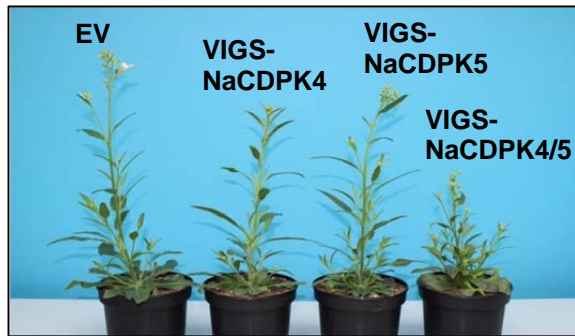**B**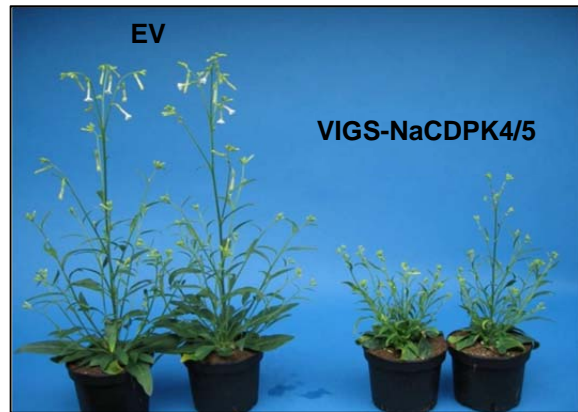**C**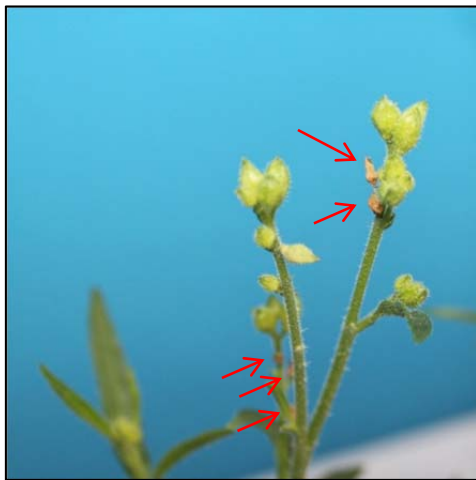

**Supplemental Figure S9.** VIGS-NaCDPK4/5 but not VIGS-NaCDPK4 or VIGS-NaCDPK5 shows developmental defects.

(**A**) Fifty-five days old EV, VIGS-NaCDPK4, VIGS-NaCDPK5, and VIGS-NaCDPK4/5 plants. (**B**) Sixty-five days old EV and VIGS-NaCDPK4/5. (**C**) Flower buds of VIGS-NaCDPK4/5 plants. Red arrows indicate aborted buds which had completely dried out.

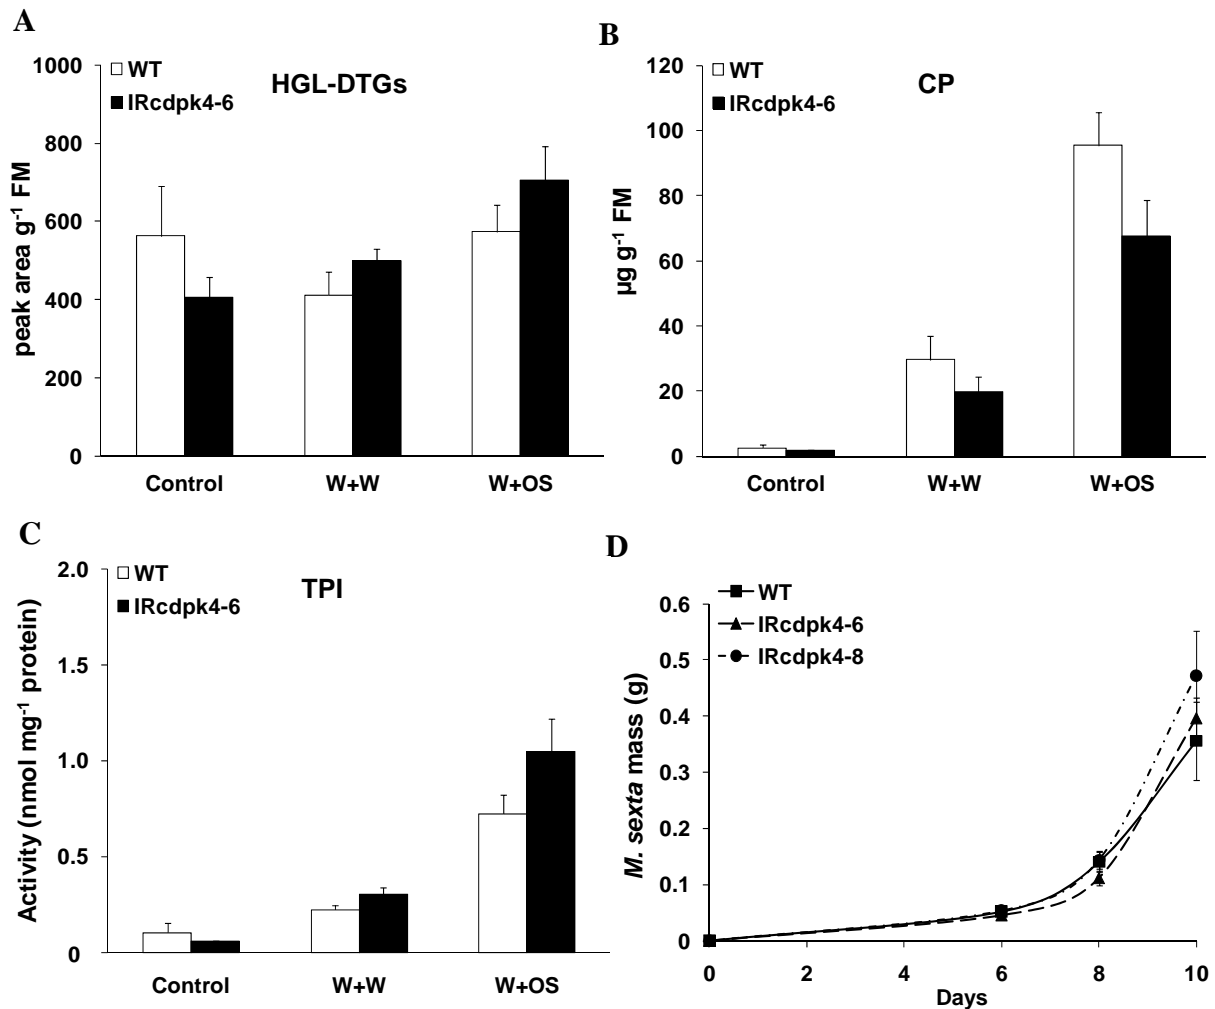

**Supplemental Figure S10.** Silencing *NaCDPK4* alone does not result in enhanced levels of wounding- and herbivory-induced defensive secondary metabolites and insect resistance.

Wild-type (WT) and IRcdpk4 (lines IRcdpk4-6 and IRcdpk4-8) were wounded with a pattern wheel and 20 μL of water or *M. sexta* OS were applied to wounds (W+W and W+OS, respectively). Concentration (mean ± SE) of (A) 17-hydroxygeranylinalool diterpene glucosides (HGL-DTGs) and (B) caffeoylputrescine (CP), and (C) activity of trypsin proteinase inhibitors (TPIs) were quantified in plants 3 days after treatment; non-treated plants severed as controls. (D) Masses of *M. sexta* grown on WT and IRcdpk4 over 10 days (Student's *t*-test; *P* > 0.1, *N* = 5).

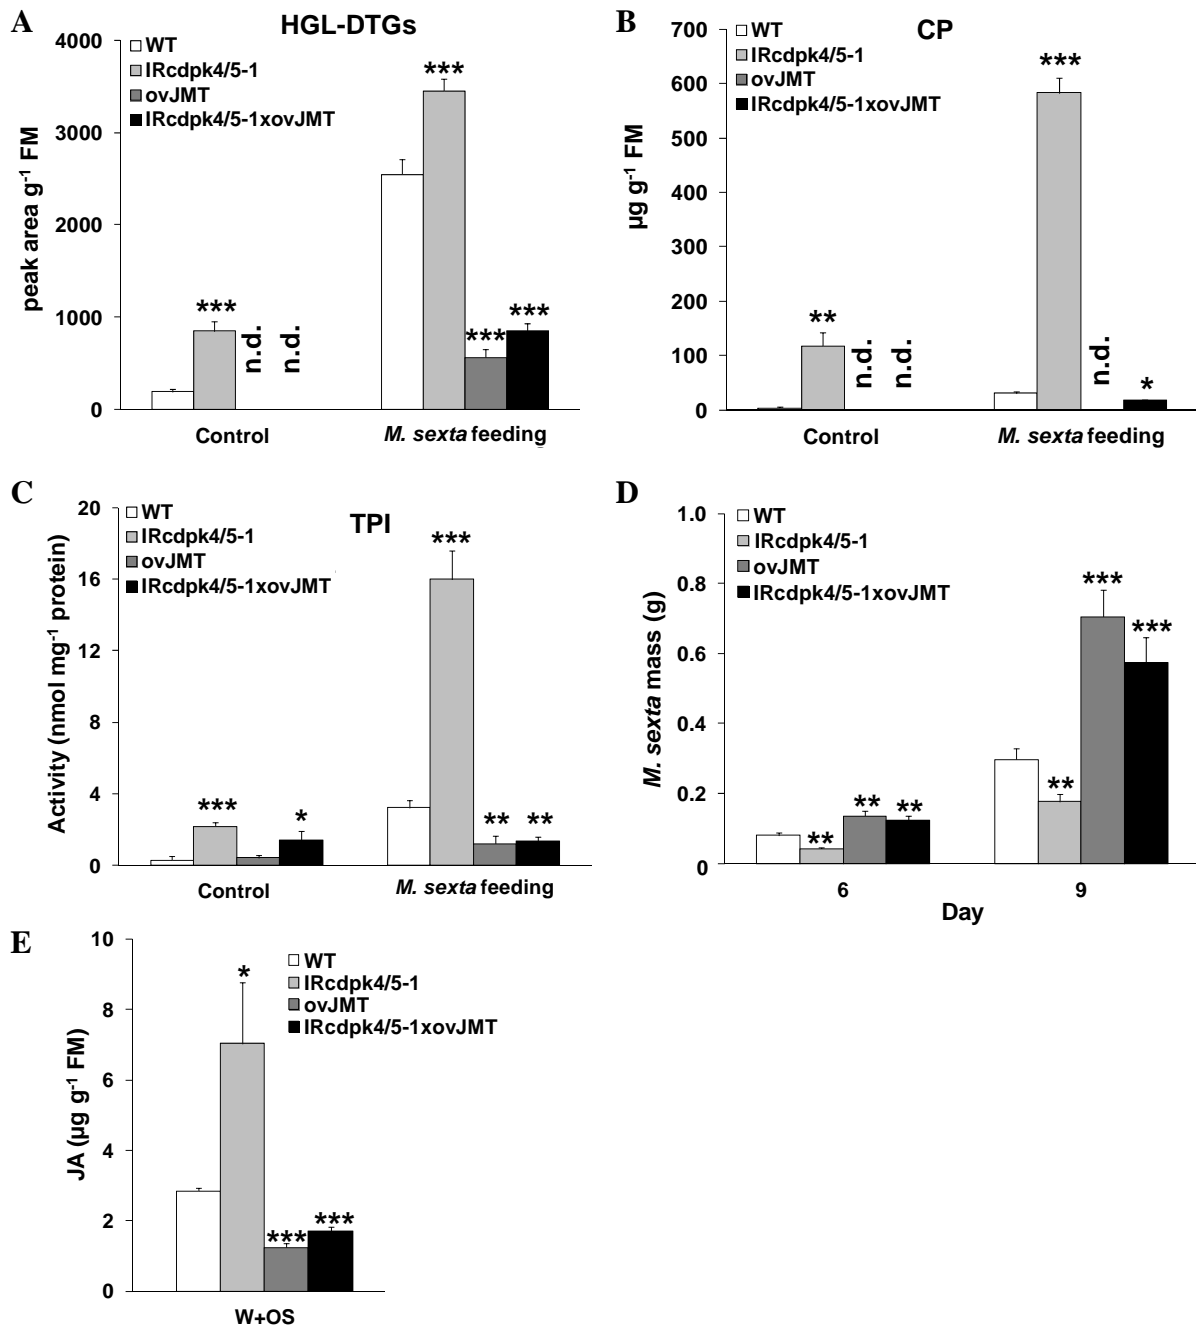

**Supplemental Figure S11.** Compromising the accumulation of JA in IRcdpk4/5 plants abolishes herbivore defenses.

*M. sexta* larvae were reared on wild-type (WT), IRcdpk4/5-1, ovJMT, and IRcdpk4/5-1xovJMT. Concentration (mean ± SE) of (A) 17-hydroxygeranyllinalool diterpene glucosides (HGL-DTGs) and (B) caffeoylputrescine (CP), and (C) activity of trypsin proteinase inhibitors (TPIs) were quantified in plants that had been fed by *M. sexta* for 9 days. (D) The masses of *M. sexta* on day 6 and 9. (E) JA levels. Plants were wounded with a pattern wheel and 20 μL of *M. sexta* OS were applied to wounds immediately. JA contents were

determined in samples collected 1 h after treatment. Asterisks indicate significant differences between WT and IRcdpk4/5-1, ovJMT, or IRcdpk4/5-1×ovJMT plants (Student's *t*-test; \*,  $P < 0.05$ ; \*\*,  $P < 0.01$ ; \*\*\*,  $P < 0.001$ ). n.d. = not detected.

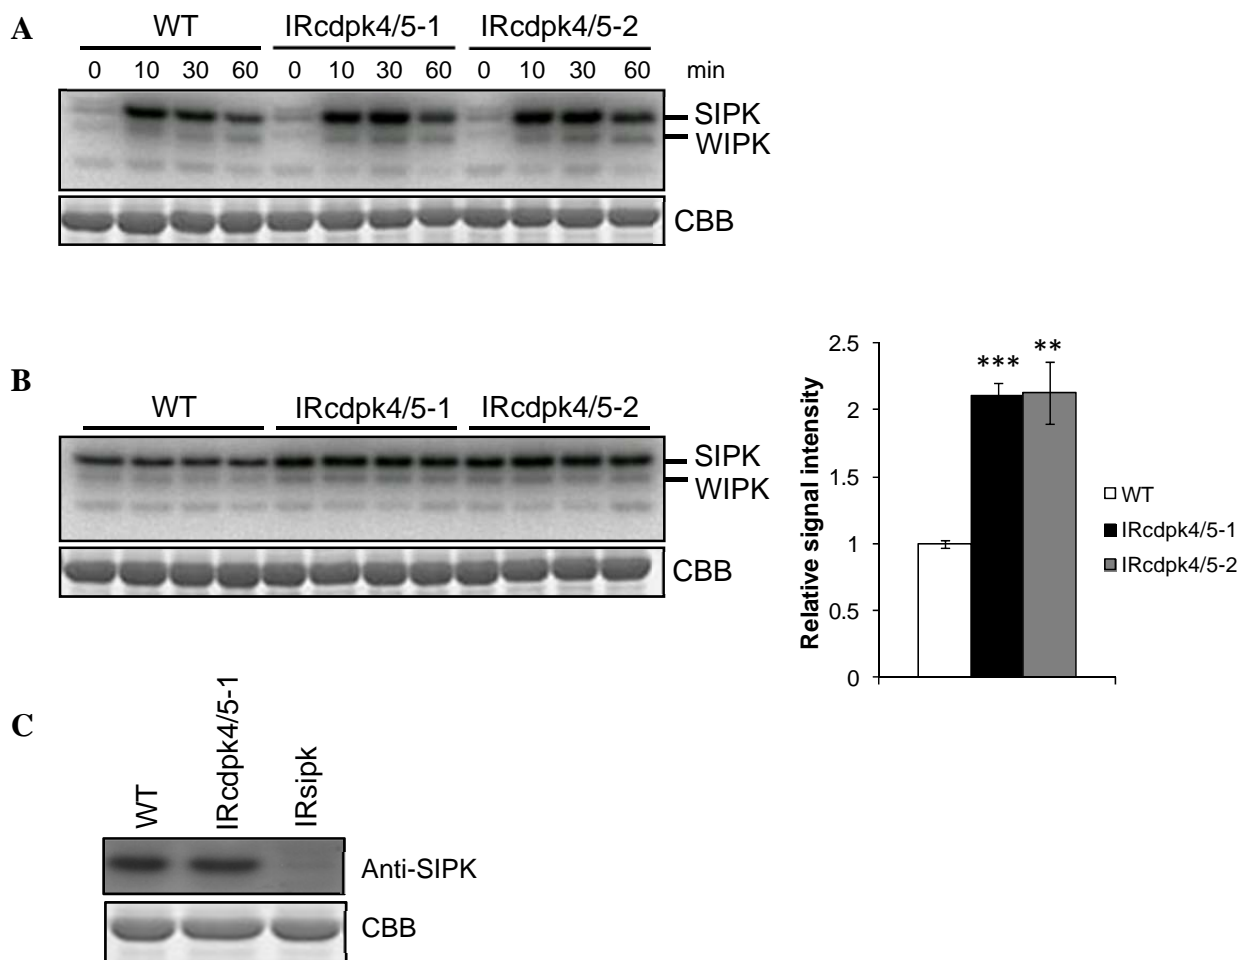

**Supplemental Figure S12.** IRcdpk4/5 plants have increased levels of SIPK activity but not abundance.

(A) MAPK activity assay in W+OS-treated WT, IRcdpk4/5-1, and IRcdpk4/5-2 plants. Note: each sample was pooled from 5 biological replicates. (B) MAPK activity levels in WT, IRcdpk4/5-1, and IRcdpk4/5-2 samples 30 min after W+OS treatment (4 biological replicates each). Right panel: quantification of relative band intensities (mean ± SE) of SIPK (the average intensity of WT samples was designated as 1); asterisks represent significant difference between WT and IRcdpk4/5 plants (N = 4, Student's *t*-test; \*\*,  $P < 0.01$ ; \*\*\*,  $P < 0.001$ ). (C) Protein blotting analysis of SIPK levels. Total proteins from wild-type (WT), IRcdpk4/5 (line IRcdpk4/5-1), and IRsipa were separated on a SDS-PAGE gel and were subsequently transferred to a PVDF membrane. Anti-SIPK antibody was used to detect the levels of SIPK protein. CBB: photograph of the RuBisCO large subunit that was visualized by staining the gel with Coomassie Brilliant Blue.

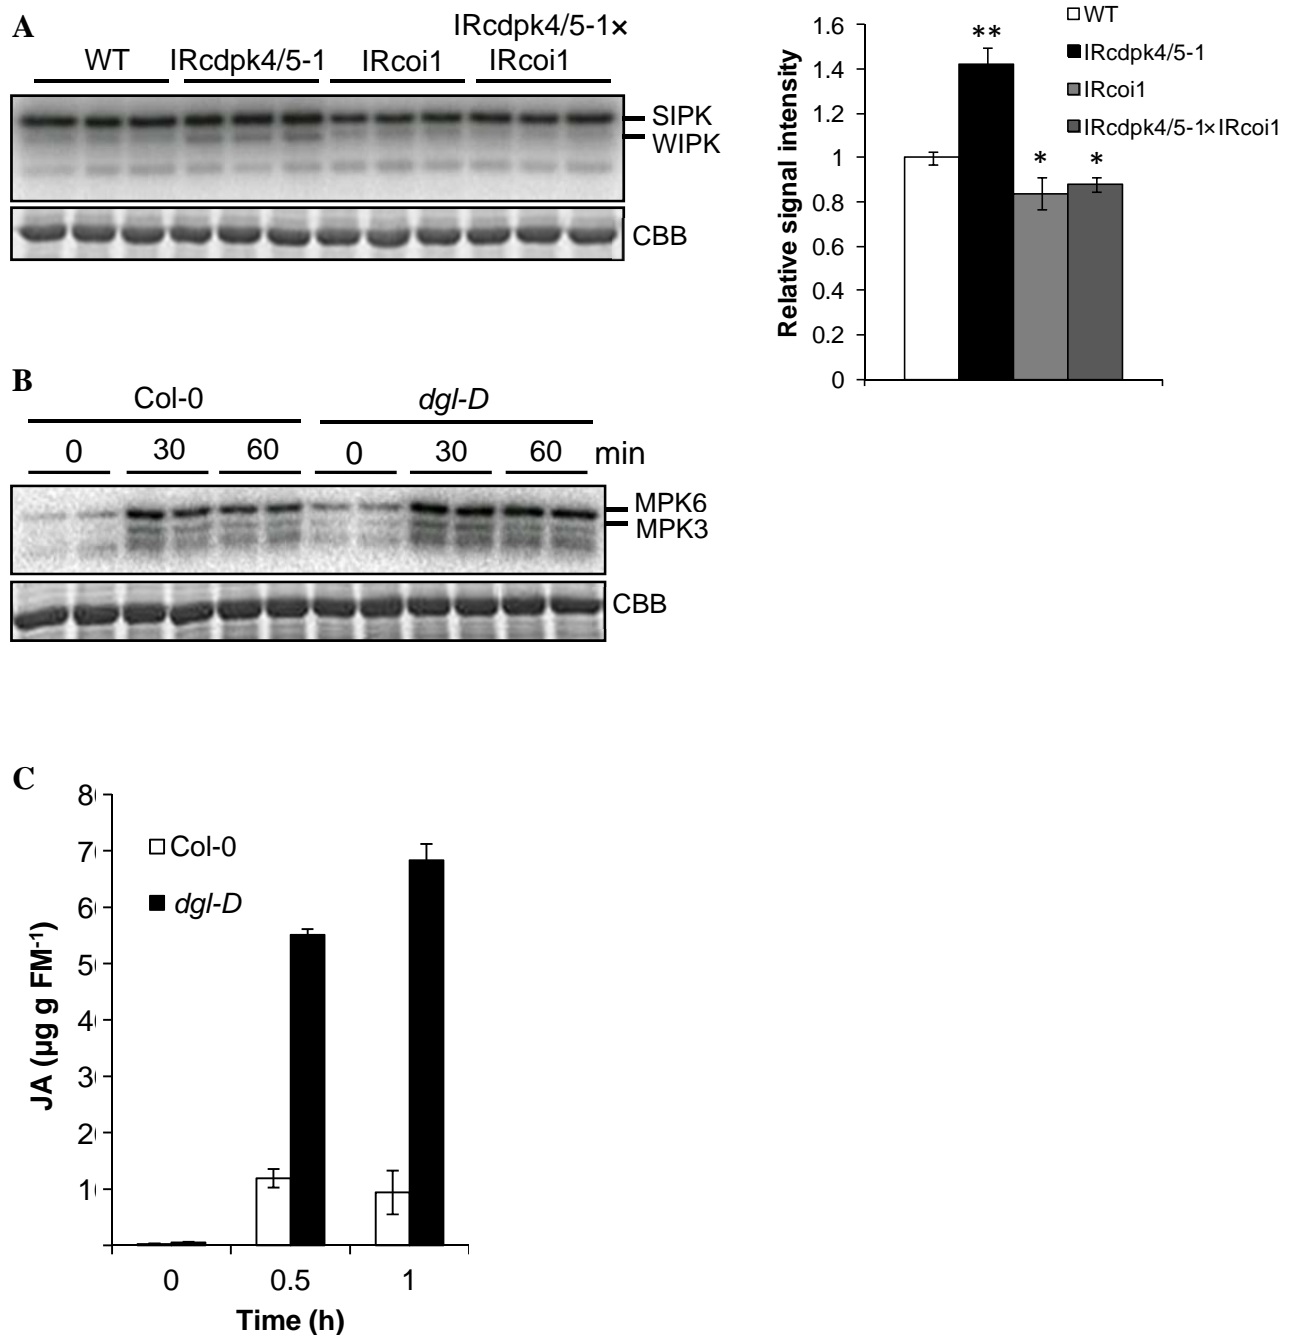

**Supplemental Figure S13.** SIPK/MPK6 and WIPK/MPK3 over-activation is dependent on the high JA levels and JA signaling.

(A) MAPK activity levels in wild-type (WT), IRcdpk4/5-1, IRcoi1, and IRcdpk4/5-1xIRcoi1 plants 30 min after being treated with W+OS (3 biological replicates each). Right panel: quantification of relative band intensities (mean  $\pm$  SE) (the average intensity of WT samples was designated as 1); asterisks represent significant difference between WT and other plants (N = 3, Student's *t*-test; \*,  $P < 0.05$ ; \*\*,  $P < 0.01$ ). (B) MAPK activity in wounded

Arabidopsis Col-0 and *dgl-D* mutant. Col-0 and *dgl-D* were wounded with a pattern wheel and MAPK activity was determined in samples harvested at indicated times using an in-gel kinase assay (2 biological replicates each). Wild-type (Col-0) and *dgl-D* plants were wounded with a pattern wheel, and JA levels (mean  $\pm$  JA) were determined in samples collected at indicated times (N = 5). (C) JA levels in wild-type and *dgl-D* Arabidopsis plants. Wild-type (Col-0) and *dgl-D* plants were wounded with a pattern wheel, and JA levels (mean  $\pm$  JA) were determined in samples collected at indicated times (N = 5).
